# Supplementary material
Source: MDPI journal article supplement (https://www.mdpi.com/2073-4441/14/17/2636)
Supplement: s1 [file s1]

Table S1.

|      | GB   | LW   |
|------|------|------|
| 2002 | 9.3  | 31.8 |
| 2003 | 21.1 | 41.6 |
| 2004 | 16.1 | 38.1 |
| 2005 | 9.1  | 42.8 |
| 2006 | 7.0  | 29.7 |
| 2007 | 7.5  | 29.8 |
| 2008 | 11.9 | 54.6 |
| 2009 | 0.8  | 13.3 |
| 2010 | 0.4  | 4.6  |
| 2011 | 3.5  | 31.1 |
